# Supplementary material
Source: publisher figshare collection journal article supplement (https://acs.figshare.com/ndownloader/files/5773254)
Supplement: Supplementary file 1 [file 5773254]

#	Name:			1OH_PM3_ESP_MNDO
#	Creating user name:	tom
#	Creation time:		Sat Mar 21 11:20:57 1992

#	Modifying user name:	tom
#	Modification time:	Fri Jul  8 15:19:11 1994

@<TRIPOS>MOLECULE
1OH_PM3_ESP_MNDO
   44    47     1     3     1
SMALL
USER_CHARGES


@<TRIPOS>ATOM
      1 C1         -2.9773    0.3255   -0.6002 C.ar      1 <1>        0.4440 
      2 C2         -4.1773   -0.3959   -0.5911 C.ar      1 <1>       -0.4425 
      3 C3         -4.1404   -1.7809   -0.5026 C.ar      1 <1>       -0.0246 
      4 C4         -2.9212   -2.4373   -0.4434 C.ar      1 <1>       -0.3674 
      5 C5         -1.7195   -1.7206   -0.4514 C.ar      1 <1>        0.2584 
      6 C6         -0.4538   -2.5173   -0.4049 C.3       1 <1>       -0.2286 
      7 C6          0.7722   -1.7187   -0.8086 C.3       1 <1>       -0.1038 
      8 C8          0.7649   -0.3939   -0.0675 C.3       1 <1>       -0.1535 
      9 C9         -0.4375    0.4563   -0.5323 C.3       1 <1>        0.3155 
     10 C10        -1.7252   -0.3204   -0.5008 C.ar      1 <1>       -0.4301 
     11 C11        -0.4932    1.7508    0.2891 C.3       1 <1>       -0.1710 
     12 C12         0.7996    2.5558    0.1889 C.3       1 <1>       -0.3742 
     13 C13         1.9982    1.6992    0.5995 C.3       1 <1>        0.3329 
     14 C14         2.0155    0.4428   -0.3072 C.3       1 <1>        0.0394 
     15 C15         3.3953   -0.1603   -0.0626 C.3       1 <1>       -0.2792 
     16 C16         4.3155    1.0568    0.1132 C.3       1 <1>       -0.1070 
     17 C17         3.3972    2.2970    0.2651 C.3       1 <1>        0.1590 
     18 C18         1.9129    1.3572    2.0881 C.3       1 <1>       -0.5081 
     19 O1         -2.9846    1.6938   -0.7178 O.3       1 <1>       -0.6695 
     20 O17         3.9464    3.1622    1.2323 O.3       1 <1>       -0.6670 
     21 ****       -5.1420    0.1208   -0.6569 H         1 <1>        0.1979 
     22 ****       -5.0743   -2.3519   -0.4890 H         1 <1>        0.1558 
     23 ****       -2.8956   -3.5318   -0.3927 H         1 <1>        0.1854 
     24 ****       -0.5509   -3.4094   -1.0557 H         1 <1>        0.0896 
     25 ****       -0.3315   -2.9078    0.6266 H         1 <1>        0.0814 
     26 ****        0.7900   -1.5500   -1.9036 H         1 <1>        0.0581 
     27 ****        1.6947   -2.2864   -0.5756 H         1 <1>        0.0532 
     28 ****        0.6717   -0.5958    1.0343 H         1 <1>        0.1207 
     29 ****       -0.2813    0.7333   -1.6080 H         1 <1>        0.0386 
     30 ****       -0.7111    1.5138    1.3499 H         1 <1>        0.0553 
     31 ****       -1.3588    2.3597   -0.0654 H         1 <1>        0.1336 
     32 ****        0.7318    3.4587    0.8272 H         1 <1>        0.1027 
     33 ****        0.9363    2.9279   -0.8467 H         1 <1>        0.0751 
     34 ****        1.9925    0.7783   -1.3776 H         1 <1>        0.0294 
     35 ****        3.7170   -0.8088   -0.8973 H         1 <1>        0.0807 
     36 ****        3.3970   -0.8044    0.8373 H         1 <1>        0.0942 
     37 ****        4.9893    1.1797   -0.7535 H         1 <1>        0.0618 
     38 ****        4.9765    0.9311    0.9917 H         1 <1>        0.0928 
     39 ****        3.3465    2.8690   -0.6929 H         1 <1>        0.0203 
     40 ****        1.1600    0.5733    2.2751 H         1 <1>        0.1176 
     41 ****        1.6347    2.2339    2.6882 H         1 <1>        0.1306 
     42 ****        2.8709    0.9815    2.4739 H         1 <1>        0.1357 
     43 ****       -3.8874    1.9725   -0.8159 H         1 <1>        0.4672 
     44 ****        3.2283    3.6897    1.5578 H         1 <1>        0.3998 
@<TRIPOS>BOND
     1    1    2 ar   
     2    1   10 ar   
     3    1   19 1    
     4    2    3 ar   
     5    3    4 ar   
     6    4    5 ar   
     7    5    6 1    
     8    5   10 ar   
     9    6    7 1    
    10    7    8 1    
    11    8    9 1    
    12    8   14 1    
    13    9   10 1    
    14    9   11 1    
    15   11   12 1    
    16   12   13 1    
    17   13   14 1    
    18   13   17 1    
    19   13   18 1    
    20   14   15 1    
    21   15   16 1    
    22   16   17 1    
    23   17   20 1    
    24    2   21 1    
    25    3   22 1    
    26    4   23 1    
    27    6   24 1    
    28    6   25 1    
    29    7   26 1    
    30    7   27 1    
    31    8   28 1    
    32    9   29 1    
    33   11   30 1    
    34   11   31 1    
    35   12   32 1    
    36   12   33 1    
    37   14   34 1    
    38   15   35 1    
    39   15   36 1    
    40   16   37 1    
    41   16   38 1    
    42   17   39 1    
    43   18   40 1    
    44   18   41 1    
    45   18   42 1    
    46   19   43 1    
    47   20   44 1    
@<TRIPOS>SUBSTRUCTURE
     1 ****        1 TEMP              0 ****  ****    0 ROOT 
@<TRIPOS>SET
P1              STATIC     ATOMS    AGGREGATE SYSTEM|ACTIVE_AGG ""
44 1 2 3 4 5 6 7 8 9 10 11 12 13 14 15 16 17 18 19 \
 20 21 22 23 24 25 26 27 28 29 30 31 32 33 34 35 36 37 \
 38 39 40 41 42 43 44
@<TRIPOS>NORMAL
@<TRIPOS>FF_PBC
FORCE_FIELD_SETUP_FEATURE Force Field Setup information
v1.0  0 0.000000 0.000000 0.000000 0.000000 0.000000 0.000000 NONE 0 0 0 0 0 0 0 0 0 0 0 0 0
